# Supplementary material for: In Vitro Effect on Plasmodium falciparum and In Vivo Effect on Plasmodium berghei of Annomaal, an Oily Fraction Obtained from the Seeds of Annona squamosa
Source: MDPI journal article supplement (doi:10.3390/molecules28145472), 2023-07-17
Supplement: s1 [file s1]

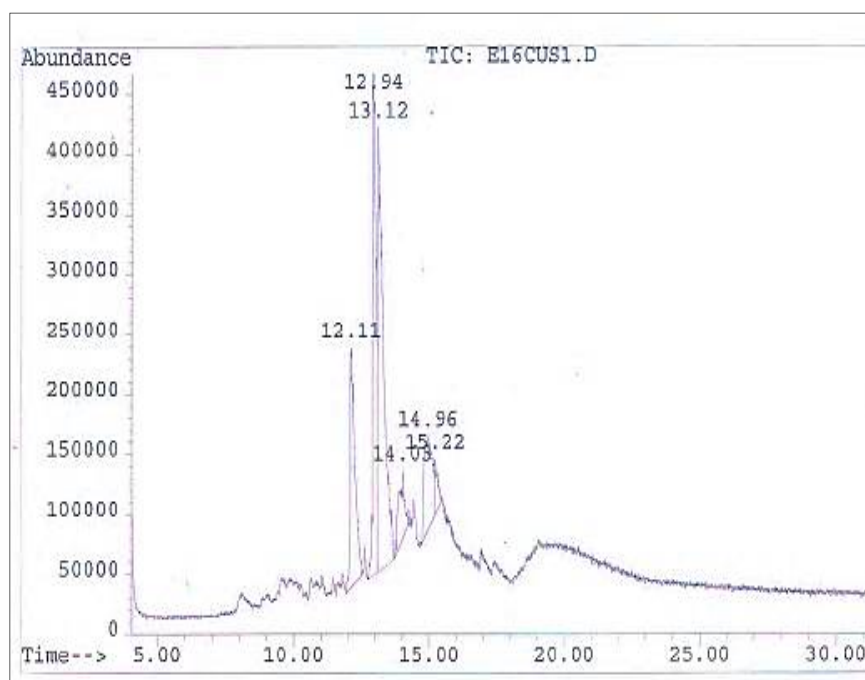

**Figure S1.** GC-MS Chromatogram of Annomaal showing peaks of various fatty acid methyl esters with linoleic acid methyl ester (major component) peak shown at retention time of 13.12 mins.

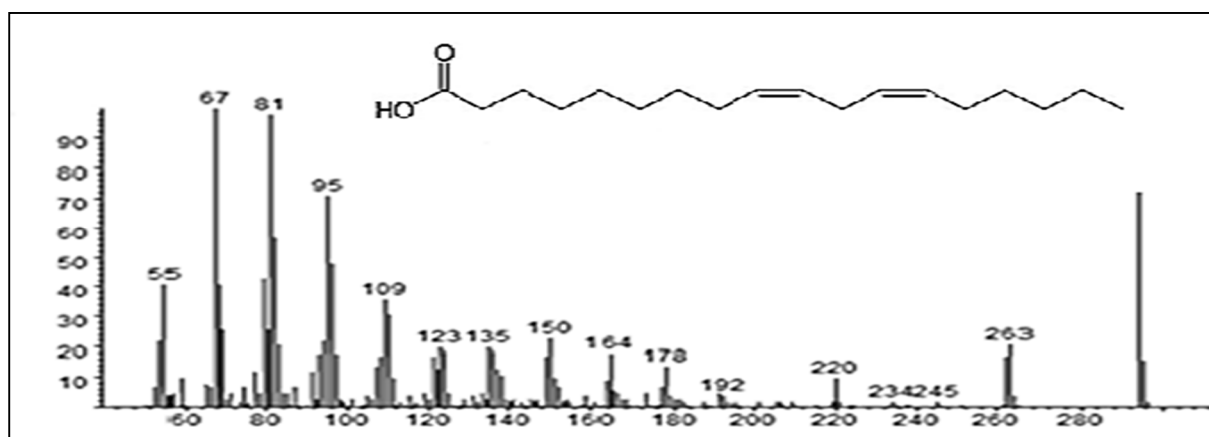

**Figure S2.** Mass spectra of 9,12-Octadecadienoic acid, methyl ester (Linoleic Acid methyl ester).
